# Supplementary material for: Excessive dietary sodium intake and elevated blood pressure: a review of current prevention and management strategies and the emerging role of pharmaconutrigenetics
Source: PubMed Central journal article supplement — BMJ Nutr Prev Health. 2018 Sep 19;1(1):7–16. doi: 10.1136/bmjnph-2018-000004 (PMC7678480; doi:10.1136/bmjnph-2018-000004), 2018-09-19
Supplement: bmjnph-2018-000004supp001.pdf [file bmjnph-2018-000004supp001.pdf]

**Supplementary Table 1. Genetic markers associated with antihypertensive agents and blood pressure response or cardiovascular outcomes**

| Gene                                        | Gene function                                                                                     | rsID                 | Associated allele                   | Risk allele prevalence <sup>a</sup>                                                    | Population studied                                                                      | Main finding                                                                                                                                                                                                                                                                                                                                   |
|---------------------------------------------|---------------------------------------------------------------------------------------------------|----------------------|-------------------------------------|----------------------------------------------------------------------------------------|-----------------------------------------------------------------------------------------|------------------------------------------------------------------------------------------------------------------------------------------------------------------------------------------------------------------------------------------------------------------------------------------------------------------------------------------------|
| <b>β-blocker</b>                            |                                                                                                   |                      |                                     |                                                                                        |                                                                                         |                                                                                                                                                                                                                                                                                                                                                |
| β <sub>1</sub> -adrenergic receptor (ADRB1) | Involved with renin release in the kidney, regulating heart rate and contractility. <sup>64</sup> | rs1801253            | C                                   | US Caucasian: 0.67<br>British Caucasian: 0.70<br>Asian: 0.79<br>African American: 0.63 | 40 hypertensive subjects from the US                                                    | An intervention study investigated blood pressure response to metoprolol. Results indicated CC carriers had significantly reduced 24-hour DBP compared to carriers of the A variant (-13.3%±8.4% versus -4.5%±8.2%, p=0.0018; or -8.6 mmHg greater reduction [-3.5 to -13.6 mmHg], p=0.0014) <sup>65</sup>                                     |
| β <sub>1</sub> -adrenergic receptor (ADRB1) | Involved with renin release in the kidney, regulating heart rate and contractility. <sup>64</sup> | rs1801252, rs1801253 | A-C (rs1801252-rs1801253) haplotype | N/A                                                                                    | 40 hypertensive subjects from the US                                                    | An intervention study investigated blood pressure response to metoprolol. Results indicated individuals with the Ser49-Arg389/ Ser49-Arg389 diplotype had significant reduction in blood pressure in comparison to carriers of the Gly49-Arg389/Ser49-Gly389 diplotype (-14.7 mmHg vs -0.5 mmHg, p=0.006) <sup>65</sup>                        |
| β <sub>1</sub> -adrenergic receptor (ADRB1) | Involved with renin release in the kidney, regulating heart rate and contractility. <sup>64</sup> | rs1801252, rs1801253 | A-C (rs1801252-rs1801253) haplotype | N/A                                                                                    | Hypertensive patients randomly assigned to atenolol (n=2,973) or verapamil SR (n=2,922) | Randomized controlled trial investigated blood pressure response to atenolol vs verapamil SR. After an average follow-up period of 2.8 years, results indicated that carriers 1 or 2 of the A-C (rs1801252-rs1801253) haplotype had an increased risk of mortality if assigned to verapamil SR (HR: 8.58, [2.06-35.8], p=0.003). <sup>64</sup> |
| G Protein-Coupled Receptor Kinase 4 (GRK4)  | Codes for an enzyme that deactivates activated G protein-coupled receptors via phosphorylation.   | rs2960306, rs1024323 | T-T (rs2960306-rs1024323) haplotype | N/A                                                                                    | 768 hypertensive subjects from the US were randomized to receive monotherapy            | Randomized controlled trial investigated blood pressure response to atenolol and hydrochlorothiazide. Results in Caucasians and African Americans indicated that increasing copies of the T-T                                                                                                                                                  |

|                                                                                  |                                                                                                                                                           |           |   |                                                                                        |                                                                                                                                         |                                                                                                                                                                                                                                                                                                                                                                                                                                                                                                                                                                                                                                                                                 |
|----------------------------------------------------------------------------------|-----------------------------------------------------------------------------------------------------------------------------------------------------------|-----------|---|----------------------------------------------------------------------------------------|-----------------------------------------------------------------------------------------------------------------------------------------|---------------------------------------------------------------------------------------------------------------------------------------------------------------------------------------------------------------------------------------------------------------------------------------------------------------------------------------------------------------------------------------------------------------------------------------------------------------------------------------------------------------------------------------------------------------------------------------------------------------------------------------------------------------------------------|
|                                                                                  | GRK4 regulates the dopamine D <sub>1</sub> receptor. The D <sub>1</sub> receptor plays a role in regulating the renal tubule ion transport. <sup>51</sup> |           |   |                                                                                        | with either atenolol (n=387) or hydrochlorothiazide (n=381)                                                                             | haplotype were significantly associated with reduced DBP lowering when treated with atenolol (0 copies: -9.1±6.8; 1 copy: -6.8±7.1; 2 copies: -5.3±6.4 mmHg, p=0.0088). <sup>66</sup>                                                                                                                                                                                                                                                                                                                                                                                                                                                                                           |
| <b>β-blockers or thiazide diuretics</b>                                          |                                                                                                                                                           |           |   |                                                                                        |                                                                                                                                         |                                                                                                                                                                                                                                                                                                                                                                                                                                                                                                                                                                                                                                                                                 |
| Neuronal precursor cell expressed developmentally down-regulated 4-like (NEDD4L) | Codes for an enzyme that helps regulate renal epithelial sodium channel (ENaC) and Na <sup>+</sup> /Cl <sup>-</sup> co-transporter (NCC) <sup>67</sup>    | rs4149601 | G | US Caucasian: 0.65<br>British Caucasian: 0.69<br>Asian: 0.79<br>African American: 0.65 | Swedish and Norwegian hypertensive patients randomized to monotherapy β-blockers (n=1,337), diuretics (n=526) or to diltiazem (n=2,036) | A retrospective analysis of data from a randomized control trial conducted in hypertensive patients either receiving diltiazem, diuretics, or β-blocker was completed. Genetic analyses indicated G carriers (GG + GA vs AA) receiving β-blockers or diuretic monotherapy had significantly higher SBP (-19.5±16.8 vs. -15.0±19.3 mmHg, p<0.001) and DBP (-15.4±8.3 vs. -14.1±8.4 mmHg, p=0.02) reduction at 6-months. <sup>67</sup><br><br>Follow-up at 4.5 years in the same study indicated G carriers (GG + GA vs AA) randomized to β-blockers and/or diuretic monotherapy had lower cardiovascular events (MI and strokes) (RR =0.52, (0.36-0.74), p<0.001). <sup>67</sup> |
| <b>Thiazide diuretic</b>                                                         |                                                                                                                                                           |           |   |                                                                                        |                                                                                                                                         |                                                                                                                                                                                                                                                                                                                                                                                                                                                                                                                                                                                                                                                                                 |
| Neuronal precursor cell expressed developmentally down-regulated 4-like (NEDD4L) | Codes for an enzyme that helps regulate renal epithelial sodium channel (ENaC) and Na <sup>+</sup> /Cl <sup>-</sup> co-transporter (NCC) <sup>67</sup>    | rs4149601 | G | US Caucasian: 0.65<br>British Caucasian: 0.69<br>Asian: 0.79<br>African American: 0.65 | 1076 controls and 269 hypertensive cases from the US and Puerto Rico                                                                    | A genetic sub-study indicated White AG carriers not treated with thiazide diuretic was significantly associated with increased risk of cardiovascular outcomes (all-cause death, nonfatal MI, nonfatal stroke) (OR: 10.65 [1.18-96.25], p=0.022). <sup>68</sup>                                                                                                                                                                                                                                                                                                                                                                                                                 |

|                                            |                                                                                                                                                                                                                                                           |                     |                                    |                                                                                        |                                                                                   |                                                                                                                                                                                                                                                                                                                                        |
|--------------------------------------------|-----------------------------------------------------------------------------------------------------------------------------------------------------------------------------------------------------------------------------------------------------------|---------------------|------------------------------------|----------------------------------------------------------------------------------------|-----------------------------------------------------------------------------------|----------------------------------------------------------------------------------------------------------------------------------------------------------------------------------------------------------------------------------------------------------------------------------------------------------------------------------------|
| Adducin 1 (ADD1)                           | Codes for a protein found in the renal tubule that helps regulate ion transport. <sup>69</sup>                                                                                                                                                            | rs4961              | T                                  | US Caucasian: 0.22<br>British Caucasian: 0.26<br>Asian: 0.54<br>African American: 0.06 | 477 hypertensive individuals and 322 normotensive individuals in Milan and France | An intervention study investigated blood pressure response to hydrochlorothiazide. Results indicated heterozygous carriers of the T allele had a significant response to hydrochlorothiazide when compared to carriers of the AA genotype at two-months (mean: -14.7 (SE 2.2) vs -6.8 (SE 1.4) mmHg, p=0.002). <sup>69</sup>           |
| <b>Number of antihypertensive agents</b>   |                                                                                                                                                                                                                                                           |                     |                                    |                                                                                        |                                                                                   |                                                                                                                                                                                                                                                                                                                                        |
| G Protein-Coupled Receptor Kinase 4 (GRK4) | Codes for an enzyme that deactivates activated G protein-coupled receptors via phosphorylation. GRK4 regulates the dopamine D <sub>1</sub> receptor. The D <sub>1</sub> receptor plays a role in regulating the renal tubule ion transport. <sup>51</sup> | rs296036, rs1024323 | A-T (rs296036-rs1024323) haplotype | N/A                                                                                    | 100 patients with hypertension in Zurich                                          | GRK4 variants were investigated and associated with the number of antihypertensive agents required for blood pressure control. Results indicated individuals homozygous for the A-T haplotype (vs 1 or 0 copies) required significantly more antihypertensive agents for blood pressure control (2.59 vs 1.95, p=0.043). <sup>70</sup> |

Adapted from a published review<sup>63</sup>

<sup>a</sup>Based on 1000 Genomes Project Samples.<sup>53</sup>

Ethnic groups defined by specific 1000 Genomes Project populations: *US Caucasian*: Utah residents with northern and western European ancestry (CEU); *British Caucasian*: British in England and Scotland (GBR); *Asian*: Han Chinese in Beijing, China (CHB); *African American*: Americans of African Ancestry in SW USA (ASW)

**Abbreviations:**

SR= sustained release, HR = hazard ratio, SBP= systolic blood pressure, DBP= diastolic blood pressure, MI=myocardial infarction, RR=relative risk, OR=odds ratio, SE = standard error

**Supplementary Table 2. A summary of genetic markers associated with resistant hypertension and treatment efficacy**

| Gene                                                            | Gene function                                                                                                                                                                    | rsID          | Associated risk allele | Risk allele prevalence <sup>a</sup>                                                                                                                                                                     | Population studied                                                                                             | Main finding                                                                                                                                                                                                                                                                                                             |
|-----------------------------------------------------------------|----------------------------------------------------------------------------------------------------------------------------------------------------------------------------------|---------------|------------------------|---------------------------------------------------------------------------------------------------------------------------------------------------------------------------------------------------------|----------------------------------------------------------------------------------------------------------------|--------------------------------------------------------------------------------------------------------------------------------------------------------------------------------------------------------------------------------------------------------------------------------------------------------------------------|
| <b>Resistant hypertension</b>                                   |                                                                                                                                                                                  |               |                        |                                                                                                                                                                                                         |                                                                                                                |                                                                                                                                                                                                                                                                                                                          |
| Inducible nitric oxide synthase (iNOS)                          | Induced when inflammation or cardiac damage is present and can cause vascular dysfunction when nitric oxide reacts with oxygen species to produce peroxynitrite. <sup>72</sup>   | rs2297518     | A                      | US Caucasian: 0.18<br>British Caucasian: 0.24<br>Asian: 0.16<br>African American: 0.15                                                                                                                  | 113 normotensive, 115 with controlled hypertension, and 82 individuals with resistant hypertension in Brazil   | In a retrospective analysis, GA and AA carriers were more commonly found among hypertensive and resistant hypertensive individuals when compared to normotensive individuals (OR = 2.05, p=0.016). <sup>73</sup>                                                                                                         |
| Angiotensinogen (AGT)                                           | Codes for a protein that is part of the first step of the renin-angiotensin system, which causes eventual blood vessels to constrict and increases blood pressure. <sup>74</sup> | rs699         | T                      | US Caucasian: 0.59<br>British Caucasian: 0.63<br>Asian: 0.21<br>African American: 0.23                                                                                                                  | 70 normotensive, 80 with controlled hypertensive, and 70 with resistant hypertension in Brazil                 | In a prospective study, a multifactor dimensionality reduction model was developed, which indicated that T allele carriers were at an increased risk for hypertension (controlled and resistant), especially for subjects over the age of 50 years. <sup>73</sup>                                                        |
| Angiotensinogen (AGT)                                           | Codes for a protein that is part of the first step of the renin-angiotensin system, which causes eventual blood vessels to constrict and increases blood pressure. <sup>74</sup> | rs699, rs5051 | T (rs699), G (rs5051)  | rs699<br>US Caucasian: 0.59<br>British Caucasian: 0.63<br>Asian: 0.21<br>African American: 0.23<br><br>rs5051<br>US Caucasian: 0.61<br>British Caucasian: 0.63<br>Asian: 0.22<br>African American: 0.77 | 2,354 treatment responsive controls, 2,203 treatment resistant cases from a multicenter study                  | In a case-control retrospective analysis, variants that were significantly associated with resistant hypertension included the rs699 T allele (OR: 1.27 (1.12-1.44), p=0.0001), and rs5051 G allele (OR: 1.36 (1.20-1.53), p<0.0001). This relationship was found in Caucasians but not African Americans. <sup>75</sup> |
| ATPase Plasma Membrane Ca <sup>2+</sup> Transporting 1 (ATP2B1) | Codes for a protein that is involved with intracellular calcium homeostasis and smooth cell contraction. <sup>76</sup>                                                           | rs12817819    | A                      | US Caucasian: 0.13<br>British Caucasian: 0.12<br>Asian: 0.06<br>African American: 0.02                                                                                                                  | 1,225 with controlled hypertension and 526 with resistant hypertension individuals from the US and Puerto Rico | In a genetic sub-study of a larger randomized controlled trial, the A allele was associated with resistant hypertension in European Americans (OR: 1.57 (1.17–                                                                                                                                                           |

|                                  |                                                                                                                                                              |            |   |                                                                                        |                                                                                              |                                                                                                                                                                                                                                                                                                                                                                          |
|----------------------------------|--------------------------------------------------------------------------------------------------------------------------------------------------------------|------------|---|----------------------------------------------------------------------------------------|----------------------------------------------------------------------------------------------|--------------------------------------------------------------------------------------------------------------------------------------------------------------------------------------------------------------------------------------------------------------------------------------------------------------------------------------------------------------------------|
|                                  |                                                                                                                                                              |            |   |                                                                                        |                                                                                              | 2.01), $p=2.44 \times 10^{-3}$ ) and Hispanics (OR:1.76 (1.27–2.44), $p=7.69 \times 10^{-4}$ ). Each additional copy of the A allele increased risk of resistant hypertension (57% to 76%). <sup>76</sup>                                                                                                                                                                |
| <b>Treatment efficacy</b>        |                                                                                                                                                              |            |   |                                                                                        |                                                                                              |                                                                                                                                                                                                                                                                                                                                                                          |
| Epithelial sodium channel (ENaC) | Major regulator of the reabsorption of salt across several epithelial tissues, including the colon, sweat glands, salivary ducts, and nephron. <sup>77</sup> | rs80311498 | T | N/A                                                                                    | 22 Black Africans and mixed-ancestry individuals with resistant hypertension in South Africa | An intervention study involving the addition of amiloride to antihypertensive regimen was conducted. Average reduction of 36/17 mmHg was observed (from an average of 172/99 mmHg). <sup>78</sup><br><br>Carriers of at least one T allele may benefit from treatment with amiloride. <sup>72</sup>                                                                      |
| Cytochrome P45011B2 (CYP11B2)    | Aldosterone synthase is the rate-limiting step in the synthesis of aldosterone. <sup>72</sup>                                                                | rs1799998  | T | US Caucasian: 0.58<br>British Caucasian: 0.49<br>Asian: 0.74<br>African American: 0.84 | 62 resistant hypertension individuals in Brazil                                              | A cross-sectional analysis investigating the impact of rs1799998 in patients with resistant hypertension using a multiple linear regression model, and the TT genotype was a significant factor for plasma aldosterone concentration levels. <sup>79</sup><br><br>Results indicated that spironolactone treatment may not be preferred for TT carriers. <sup>72 79</sup> |
| Cytochrome P450 4A11 (CYP4A11)   | Causes vasoconstriction and natriuresis through the oxidation of arachidonic acid. <sup>80</sup>                                                             | rs3890011  | C | US Caucasian: 0.78<br>British Caucasian: 0.77<br>Asian: 0.51<br>African American: 0.39 | 83 African Americans with resistant hypertension                                             | A randomized controlled pilot study investigated the genetic impact of rs3890011 on blood pressure controlled with placebo, spironolactone, amiloride, and                                                                                                                                                                                                               |

|  |  |  |  |  |  |                                                                                                                                                                                                                                                                                                                                                                                                                             |
|--|--|--|--|--|--|-----------------------------------------------------------------------------------------------------------------------------------------------------------------------------------------------------------------------------------------------------------------------------------------------------------------------------------------------------------------------------------------------------------------------------|
|  |  |  |  |  |  | <p>spironolactone plus amiloride. CC carriers had a higher response in blood pressure to amiloride (SBP: <math>-6.3 \pm 7.3</math>/DBP: <math>-3.2 \pm 4.0</math> mmHg) than spironolactone (SBP: <math>+6.8 \pm 7.9</math>/DBP: <math>+4.8 \pm 8.6</math>, <math>p &lt; 0.01 / &lt; 0.05</math>).<sup>67</sup></p> <p>Results indicated spironolactone treatment may not be effective for CC carriers.<sup>72 80</sup></p> |
|--|--|--|--|--|--|-----------------------------------------------------------------------------------------------------------------------------------------------------------------------------------------------------------------------------------------------------------------------------------------------------------------------------------------------------------------------------------------------------------------------------|

Adapted from a published review<sup>72</sup>

**<sup>a</sup>Based on 1000 Genomes Project Samples.**<sup>53</sup>

Ethnic groups defined by specific 1000 Genomes Project populations: *US Caucasian*: Utah residents with northern and western European ancestry (CEU); *British Caucasian*: British in England and Scotland (GBR); *Asian*: Han Chinese in Beijing, China (CHB); *African American*: Americans of African Ancestry in SW USA (ASW)

**Abbreviations:**

OR=odds ratio, SBP=systolic blood pressure, DBP=diastolic blood pressure
